# Supplementary material for: High-resolution mapping of time since disturbance and forest carbon flux from remote sensing and inventory data to assess harvest, fire, and beetle disturbance legacies in the Pacific Northwest
Source: Copernicus journal article supplement (doi:10.5194/bg-13-6321-2016), 2016-11-25

Supplement of Biogeosciences, 13, 6321–6337, 2016  
<http://www.biogeosciences.net/13/6321/2016/>  
doi:10.5194/bg-13-6321-2016-supplement  
© Author(s) 2016. CC Attribution 3.0 License.

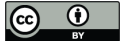

Biogeosciences  Open Access

*Supplement of*

## **High-resolution mapping of time since disturbance and forest carbon flux from remote sensing and inventory data to assess harvest, fire, and beetle disturbance legacies in the Pacific Northwest**

**Huan Gu et al.**

*Correspondence to:* Huan Gu ([hugu@clarku.edu](mailto:hugu@clarku.edu), [guhuan114031@gmail.com](mailto:guhuan114031@gmail.com))

The copyright of individual parts of the supplement might differ from the CC-BY 3.0 licence.

## Supplementary Table

**Table S1** List of forest type group, stand age class and site productivity class

| <b>Forest Type Group</b>          | <b>Stand Age Class<br/>(year)</b> | <b>Site Productivity Class<br/>(cubic feet/acre/year)</b> |
|-----------------------------------|-----------------------------------|-----------------------------------------------------------|
| White/Red/Jack Pine Group         | 0 – 20                            | 0 – 19                                                    |
| Spruce/Fir Group                  | 20 – 40                           | 20 – 49                                                   |
| Longleaf/Slash Pine Group         | 40 – 60                           | 50 – 84                                                   |
| Loblolly/Shortleaf Pine Group     | 60 – 80                           | 85 – 119                                                  |
| Pinyon/Juniper Group              | 80 – 100                          | 120 – 164                                                 |
| Douglas-fir Group                 | 100 – 120                         | 165 – 224                                                 |
| Ponderosa Pine Group              | 120 – 140                         | 225 +                                                     |
| Western White Pine Group          | 140 – 160                         |                                                           |
| Fir/Spruce/Mountain Hemlock Group | 160 – 180                         |                                                           |
| Lodgepole Pine Group              | 180 – 200                         |                                                           |
| Hemlock/Sitka Spruce Group        | 200 +                             |                                                           |
| Western Larch Group               |                                   |                                                           |
| Redwood Group                     |                                   |                                                           |
| Other Western Softwood Group      |                                   |                                                           |
| California Mixed Conifer Group    |                                   |                                                           |
| Exotic Softwoods Group            |                                   |                                                           |
| Oak/Pine Group                    |                                   |                                                           |
| Oak/Hickory Group                 |                                   |                                                           |
| Oak/Gum/Cypress Group             |                                   |                                                           |
| Elm/Ash/Cottonwood Group          |                                   |                                                           |
| Maple/Beech/Birch Group           |                                   |                                                           |
| Aspen/Birch Group                 |                                   |                                                           |
| Alder/Maple Group                 |                                   |                                                           |
| Western Oak Group                 |                                   |                                                           |
| Tanoak/Laurel Group               |                                   |                                                           |
| Other Western Hardwoods Group     |                                   |                                                           |
| Tropical Hardwoods Group          |                                   |                                                           |
| Exotic Hardwoods Group            |                                   |                                                           |

## Supplementary Figures

**Fig. S1** Carbon allocation and transfer in three live pools and ten dead pools in Carnegie-Ames-Stanford Approach (CASA) model.

**Fig. S2** Characteristic *NEP* trajectories following a stand-replacing disturbance in the PNW region. Solid lines are plotted for high site productivity, and dashed lines for low productivity.

**Fig. S3** Post-fire characteristic trajectories of *NEP* for low severity fire in the PNW region. Solid lines are plotted for high site productivity, and dashed lines for low productivity.

**Fig. S4** Post-fire characteristic trajectories of *NEP* for medium severity fire in the PNW region. Solid lines are plotted for high site productivity, and dashed lines for low productivity.

**Fig. S5** Post-fire characteristic trajectories of *NEP* for high severity fire in the PNW region. Solid lines are plotted for high site productivity, and dashed lines for low productivity.

**Fig. S6** Characteristic *NEP* trajectories for low (left), medium (middle) and high (right) bark beetle severity level in the PNW region. Solid lines are plotted for high site productivity, and dashed lines for low productivity.

**Fig. S7** Characteristic heterotrophic respiration (*R<sub>h</sub>*) trajectories following a stand-replacing disturbance in the PNW region. Solid lines are plotted for high site productivity, and dashed lines for low productivity.

**Fig. S8** Post-fire characteristic trajectories of heterotrophic respiration (*R<sub>h</sub>*) for low severity fire in the PNW region. Solid lines are plotted for high site productivity, and dashed lines for low productivity.

**Fig. S9** Post-fire characteristic trajectories of heterotrophic respiration (*R<sub>h</sub>*) for medium severity fire in the PNW region. Solid lines are plotted for high site productivity, and dashed lines for low productivity.

**Fig. S10** Post-fire characteristic trajectories of heterotrophic respiration (*R<sub>h</sub>*) for high severity fire in the PNW region. Solid lines are plotted for high site productivity, and dashed lines for low productivity.

**Fig. S11** Characteristic heterotrophic respiration (*R<sub>h</sub>*) trajectories for low (left), medium (middle) and high (right) bark beetle severity level in the PNW region. Solid lines are plotted for high site productivity, and dashed lines for low productivity.

**Fig. S12** Characteristic trajectories of carbon stocks in soil organic carbon pool (all but the slow part) following a stand-replacing disturbance in the PNW region.

**Fig. S13** Characteristic trajectories of carbon stocks in litter pool following a stand-replacing disturbance in the PNW region.

**Fig. S14** Characteristic trajectories of carbon stocks in slow turnover soil carbon pool following a stand-replacing disturbance in the PNW region.

**Fig. S15** Characteristic trajectories of carbon stocks in aboveground coarse woody debris following a stand-replacing disturbance in the PNW region.

**Fig. S16** Characteristic trajectories of carbon stocks in belowground coarse woody debris following a stand-replacing disturbance in the PNW region.

**Fig. S17** Characteristic trajectories of carbon stocks in total live woody biomass following a stand-replacing disturbance in the PNW region.



**Fig. S2** Characteristic *NEP* trajectories following a stand-replacing disturbance in the PNW region. Solid lines are plotted for high site productivity, and dashed lines for low productivity.

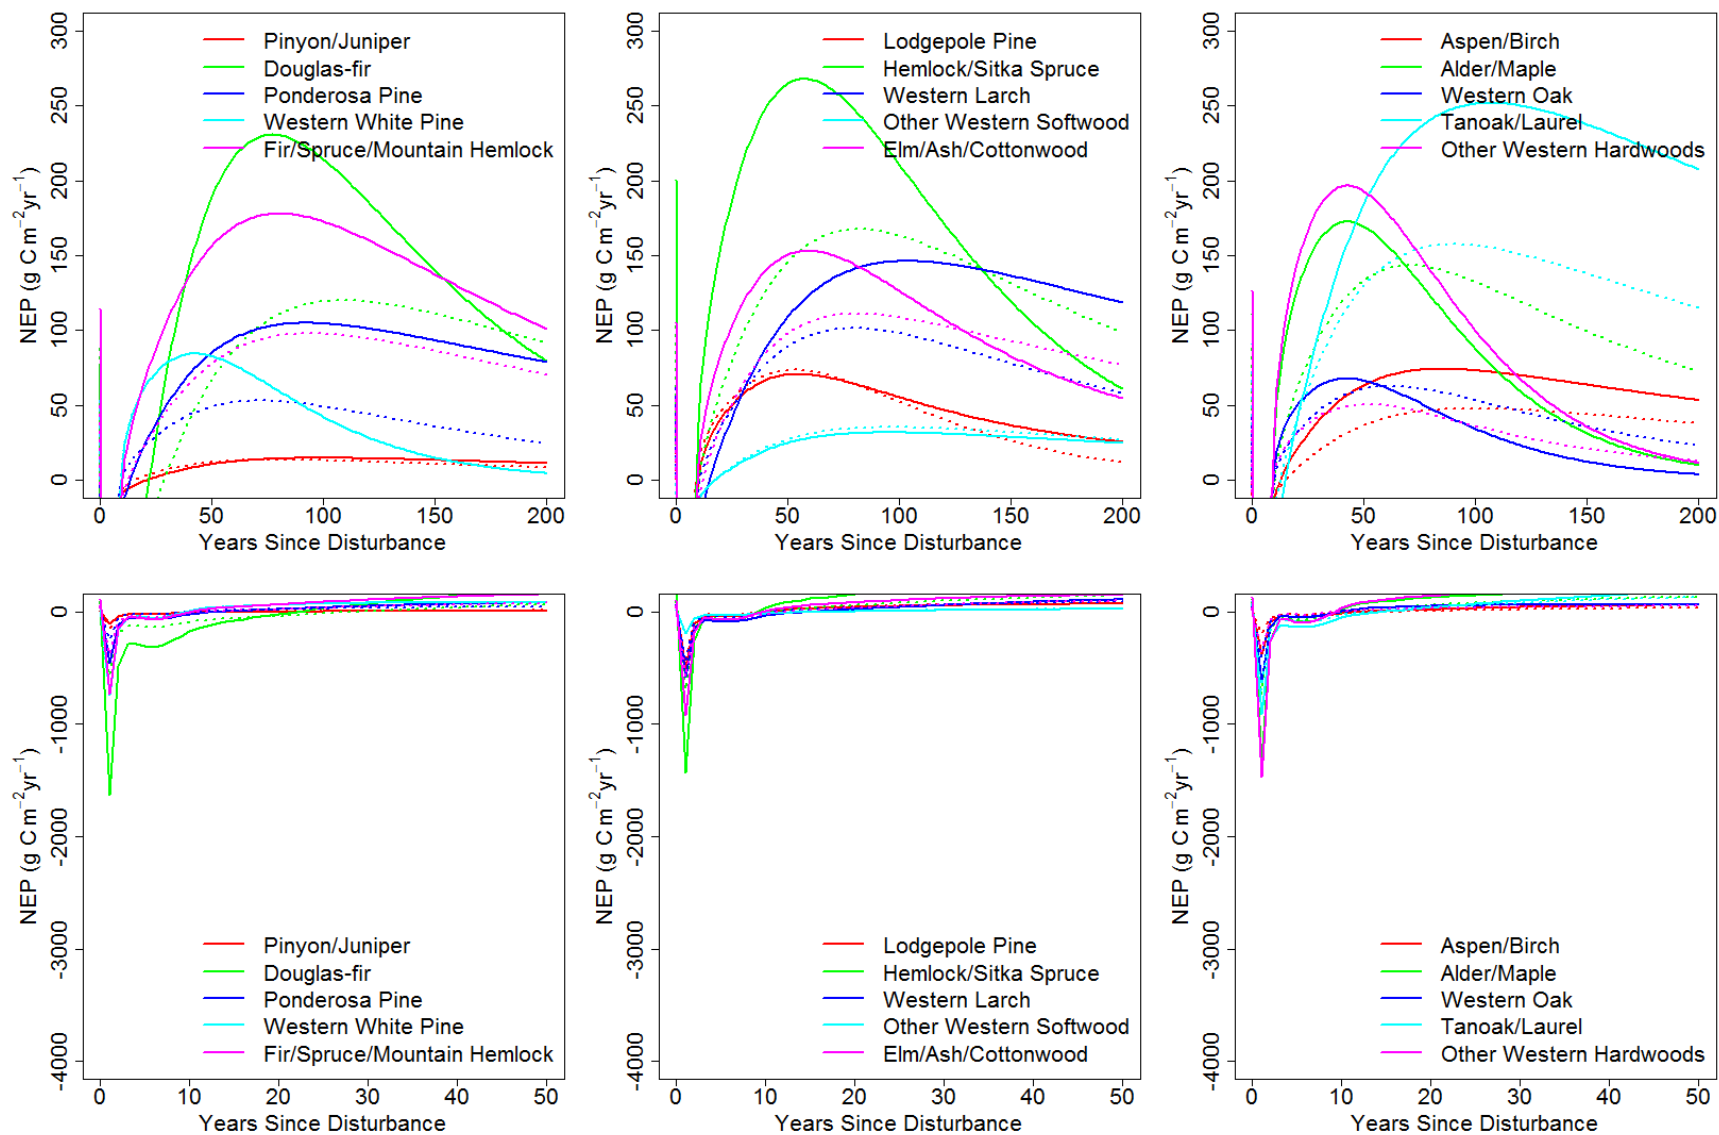

**Fig. S3** Post-fire characteristic trajectories of *NEP* for low severity fire in the PNW region. Solid lines are plotted for high site productivity, and dashed lines for low productivity.

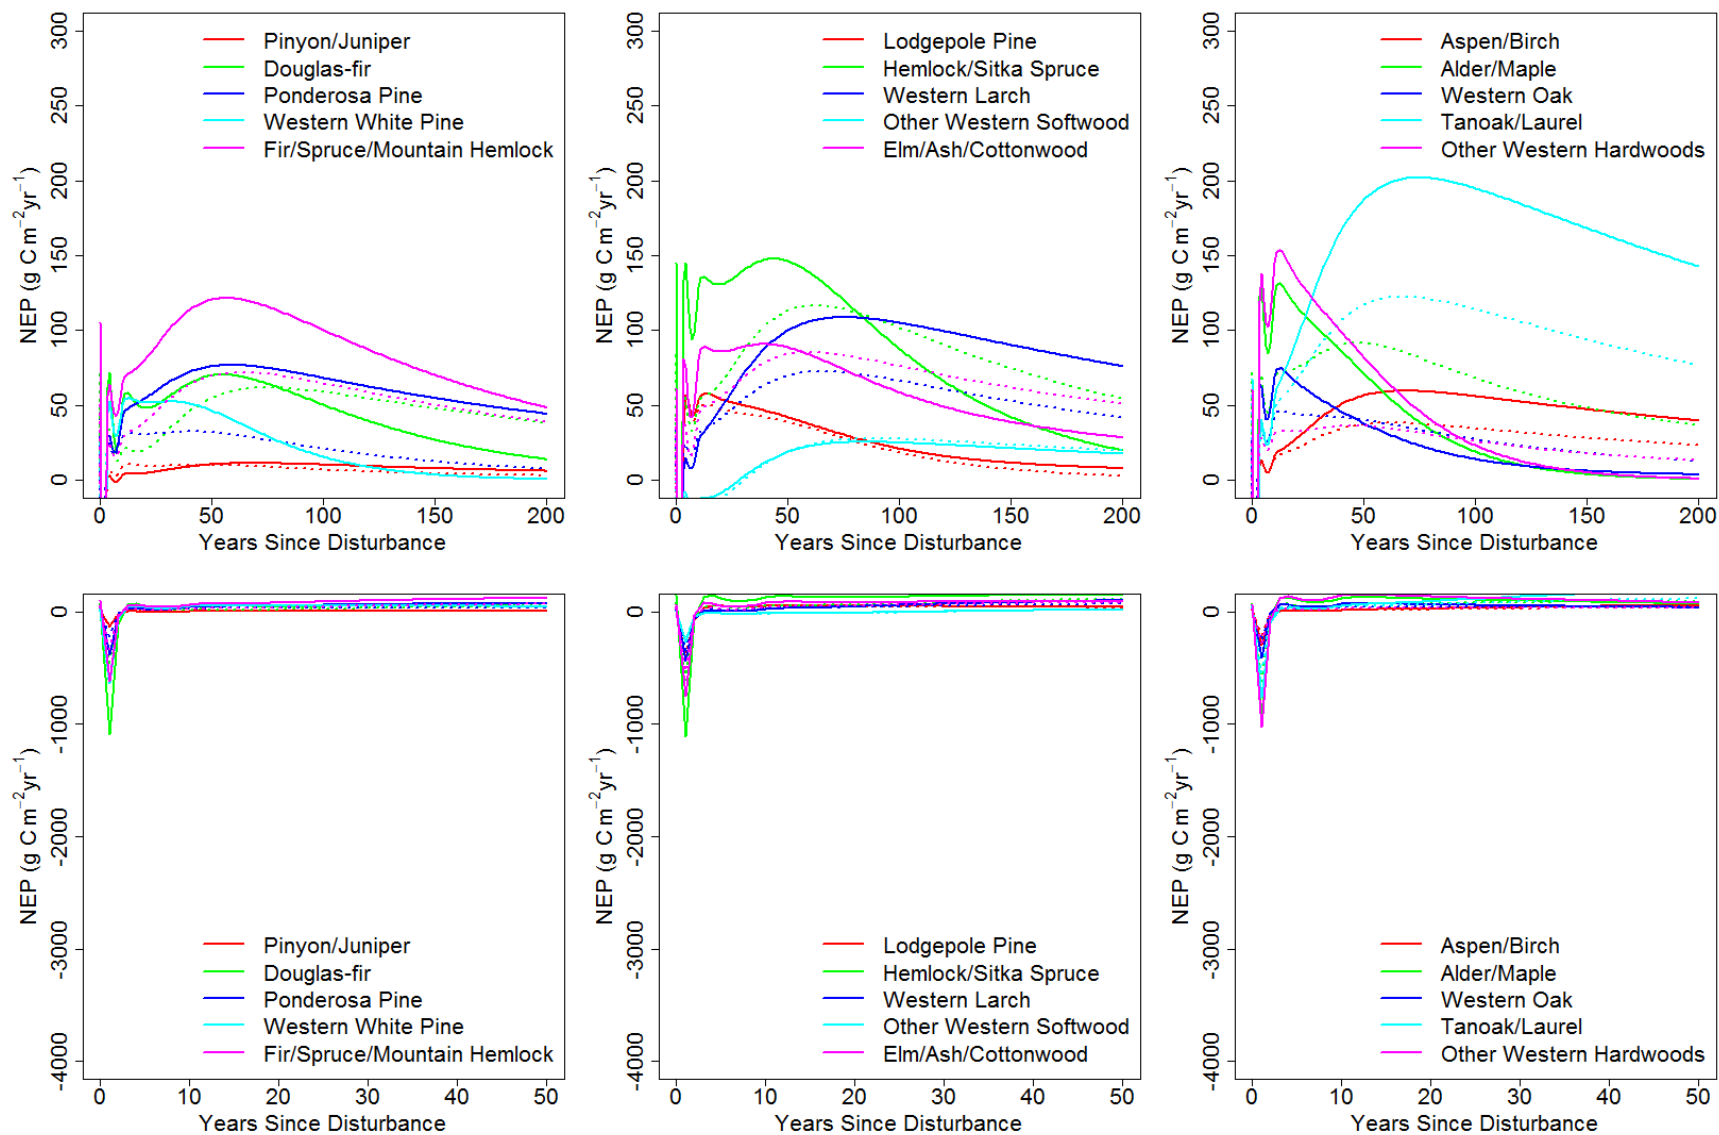

**Fig. S4** Post-fire characteristic trajectories of *NEP* for medium severity fire in the PNW region. Solid lines are plotted for high site productivity, and dashed lines for low productivity.

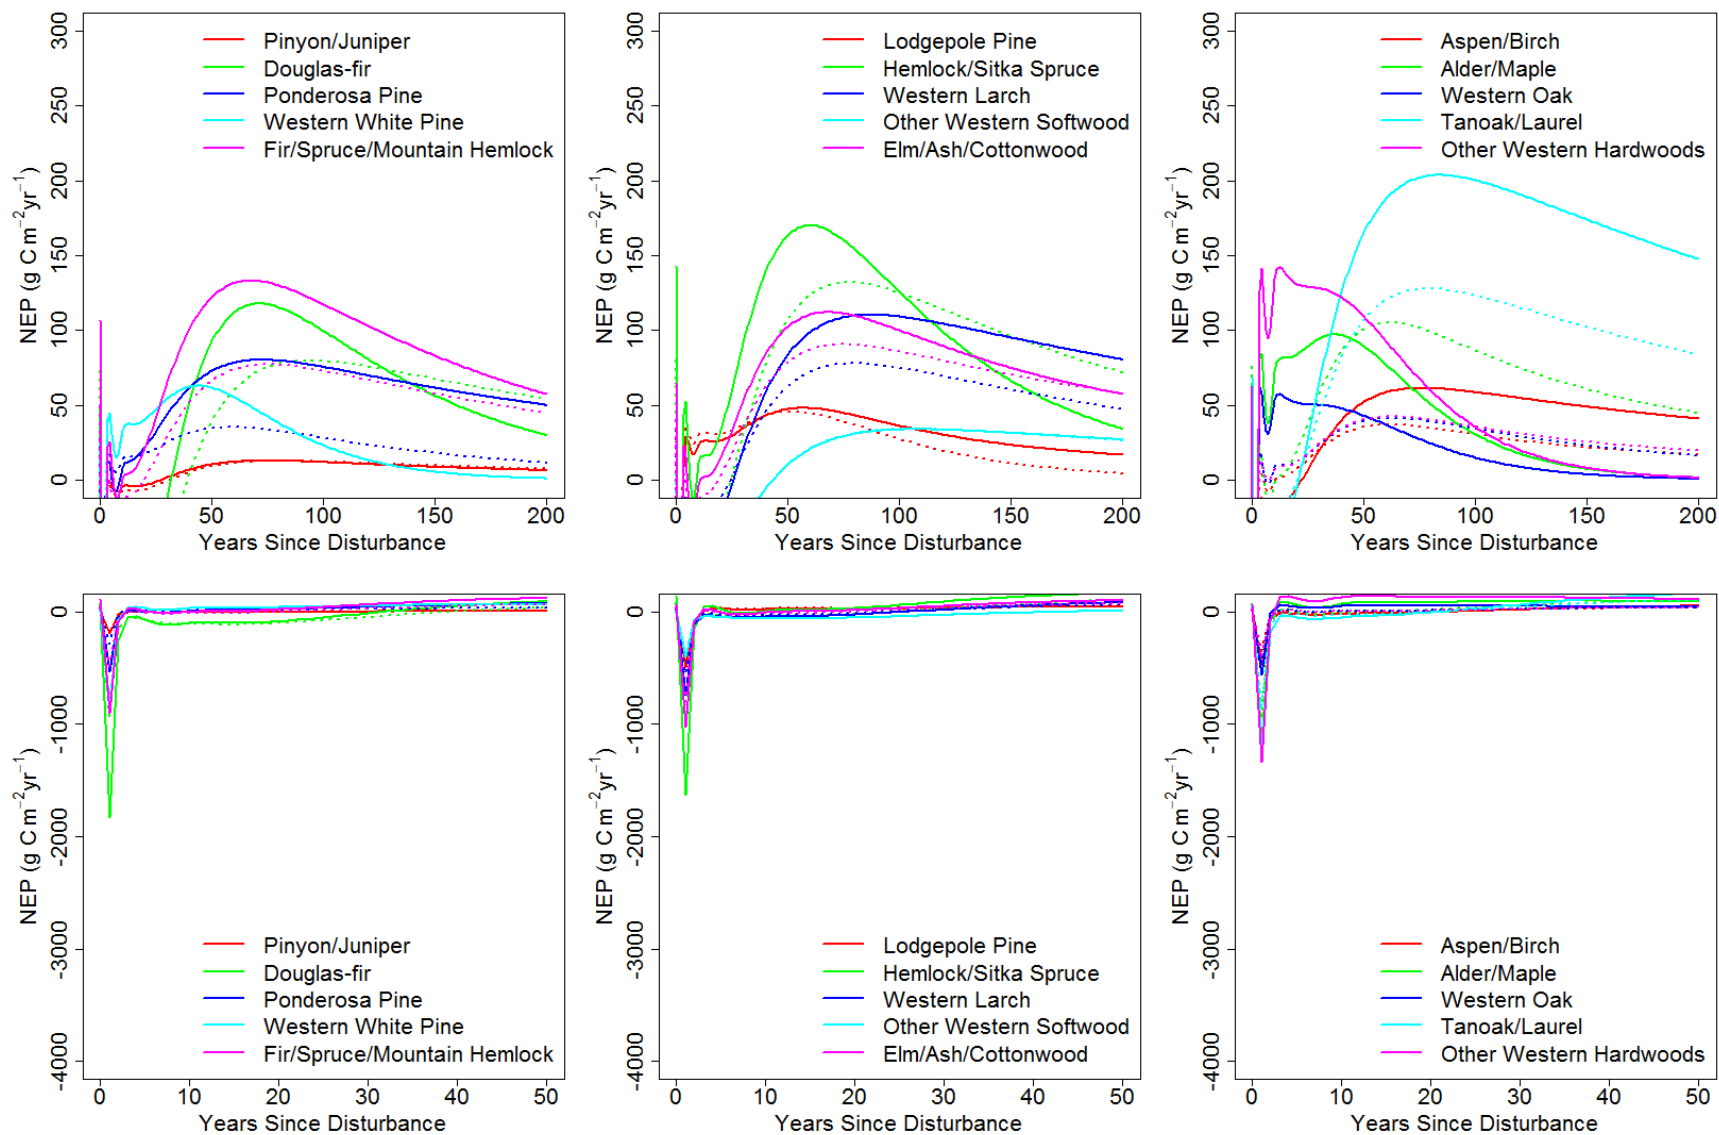

**Fig. S5** Post-fire characteristic trajectories of *NEP* for high severity fire in the PNW region. Solid lines are plotted for high site productivity, and dashed lines for low productivity.

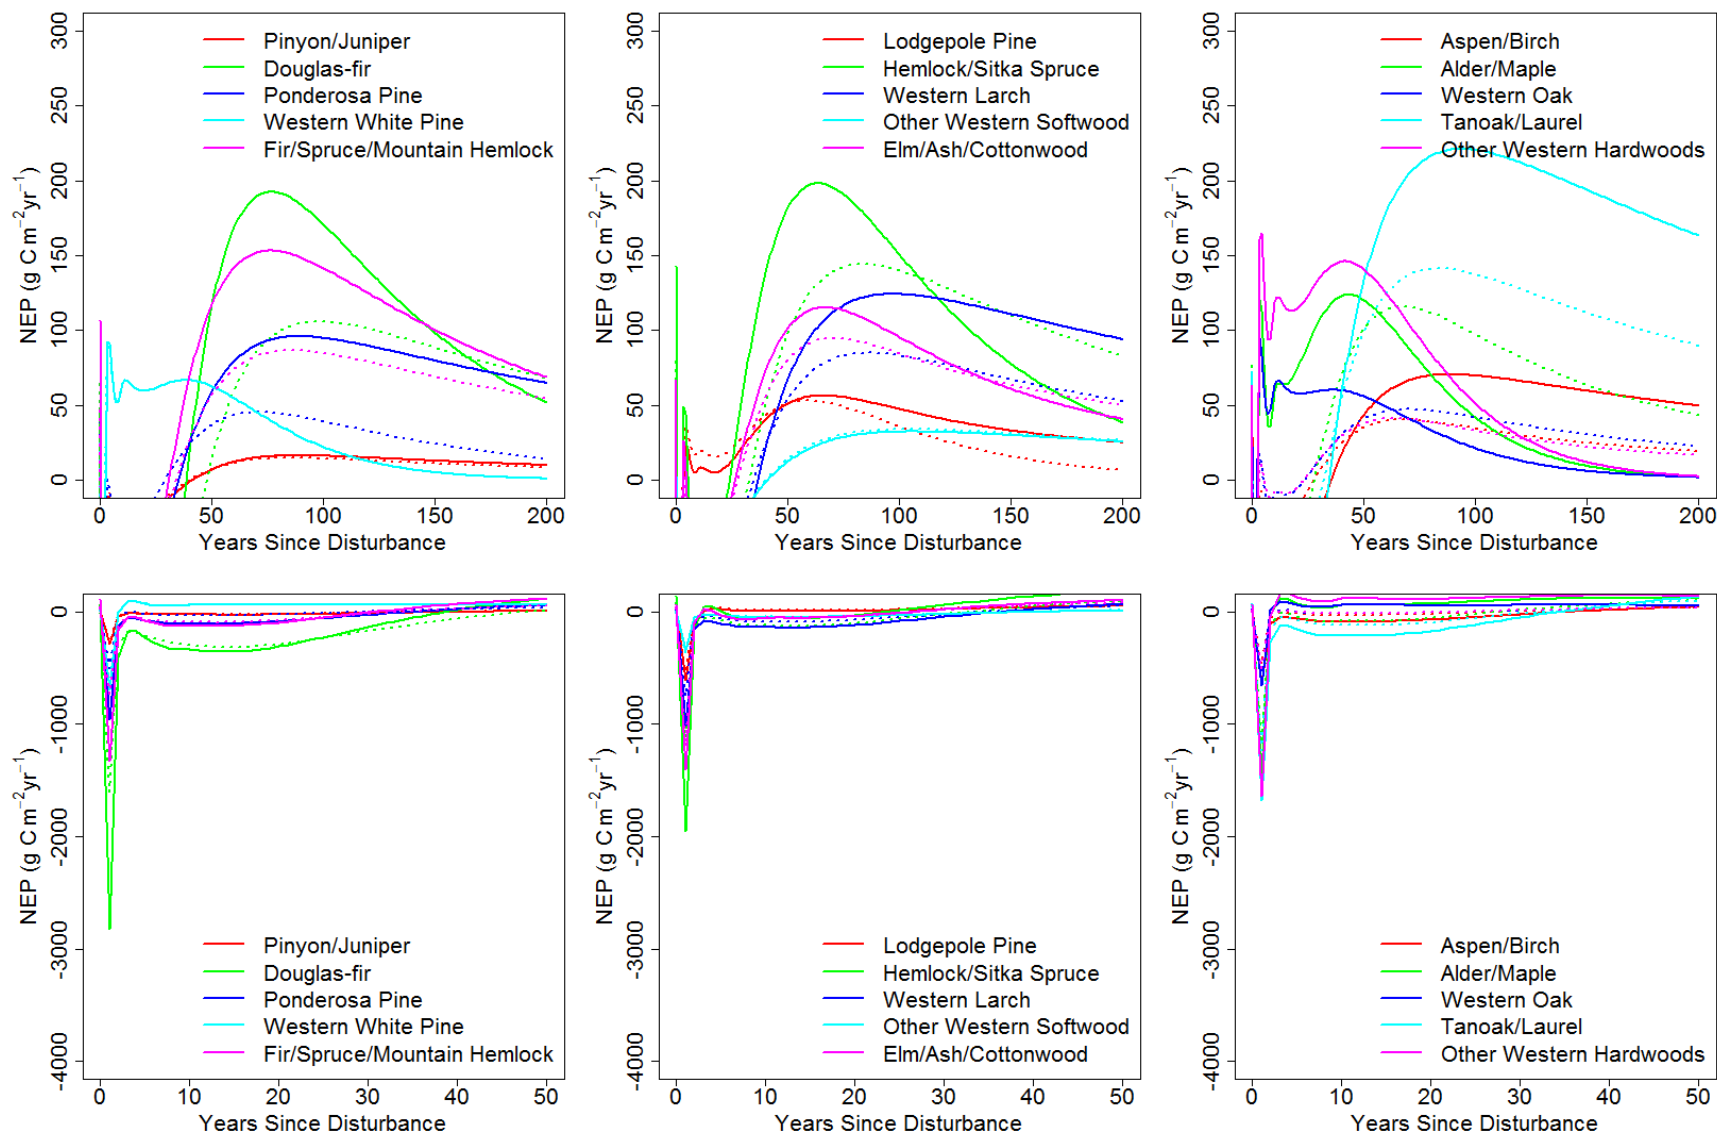



**Fig. S6** Characteristic *NEP* trajectories for low (left), medium (middle) and high (right) bark beetle severity level in the PNW region. Solid lines are plotted for high site productivity, and dashed lines for low productivity.

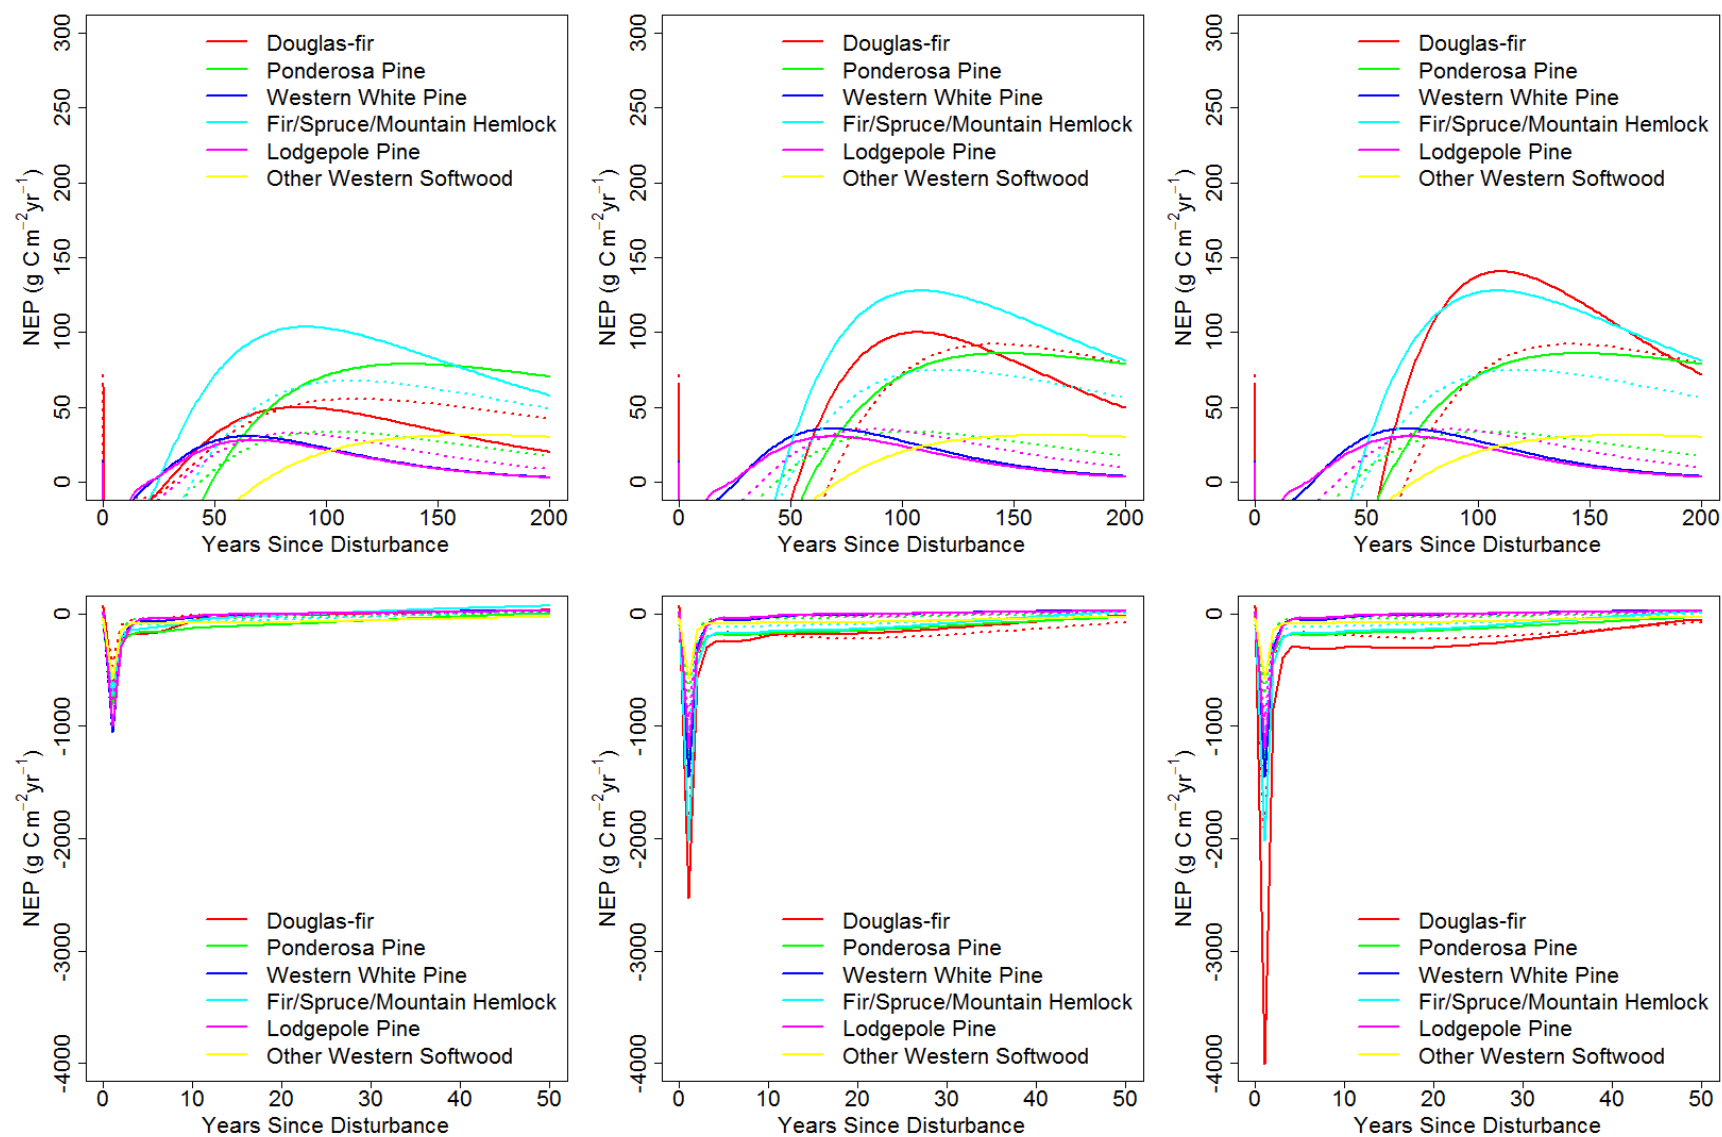

**Fig. S7** Characteristic heterotrophic respiration ( $R_h$ ) trajectories following a stand-replacing disturbance in the PNW region. Solid lines are plotted for high site productivity, and dashed lines for low productivity.

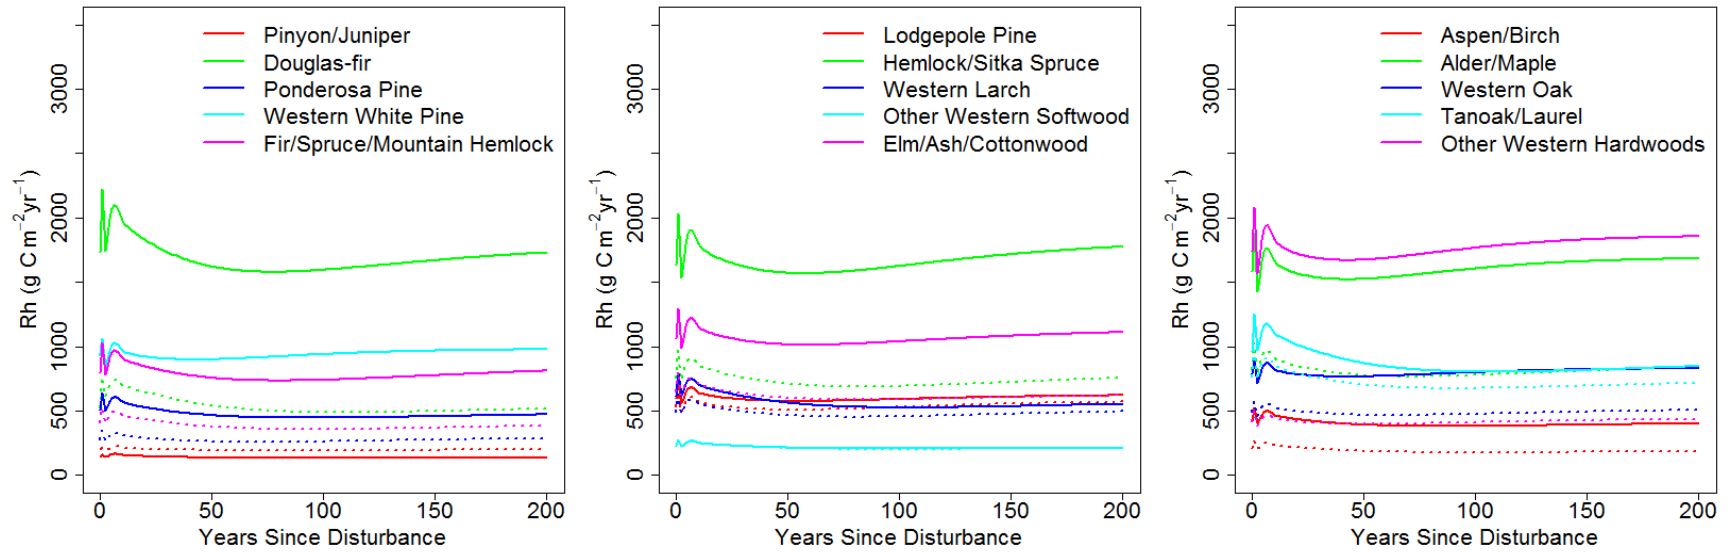

**Fig. S8** Post-fire characteristic trajectories of heterotrophic respiration ( $R_h$ ) for low severity fire in the PNW region. Solid lines are plotted for high site productivity, and dashed lines for low productivity.

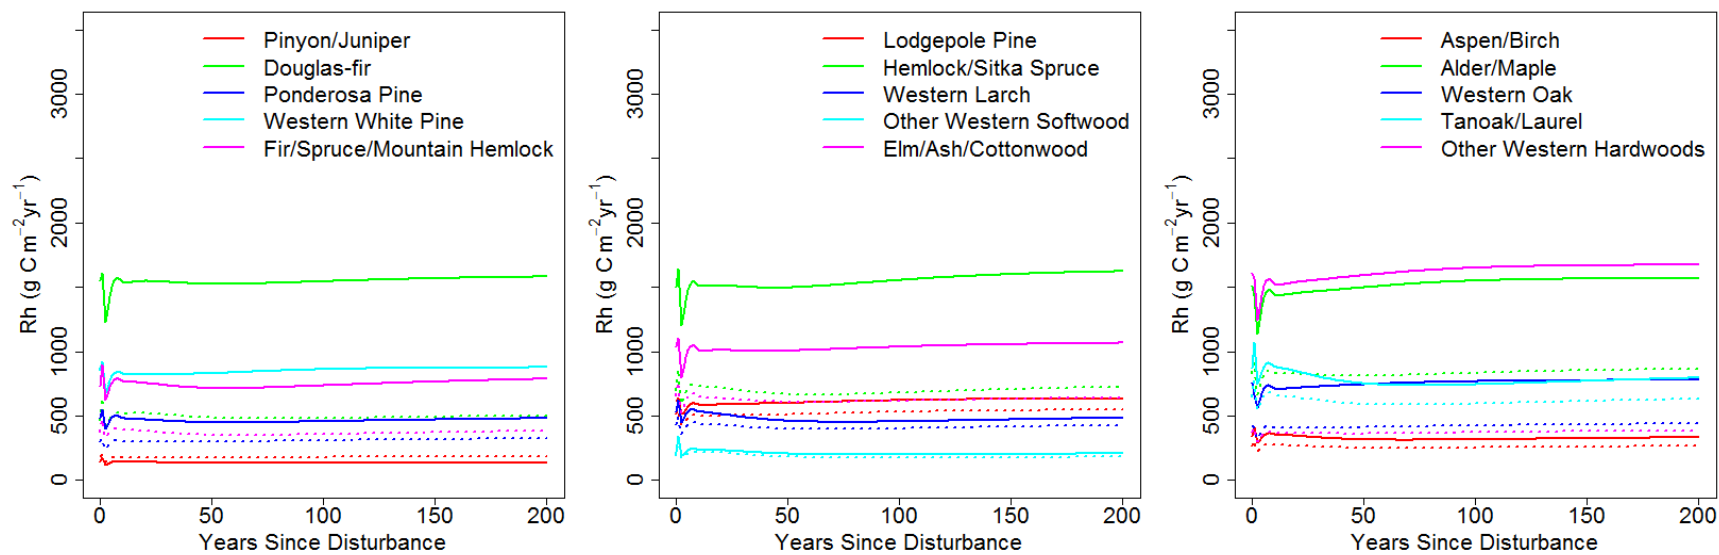

**Fig. S9** Post-fire characteristic trajectories of heterotrophic respiration ( $R_h$ ) for medium severity fire in the PNW region. Solid lines are plotted for high site productivity, and dashed lines for low productivity.

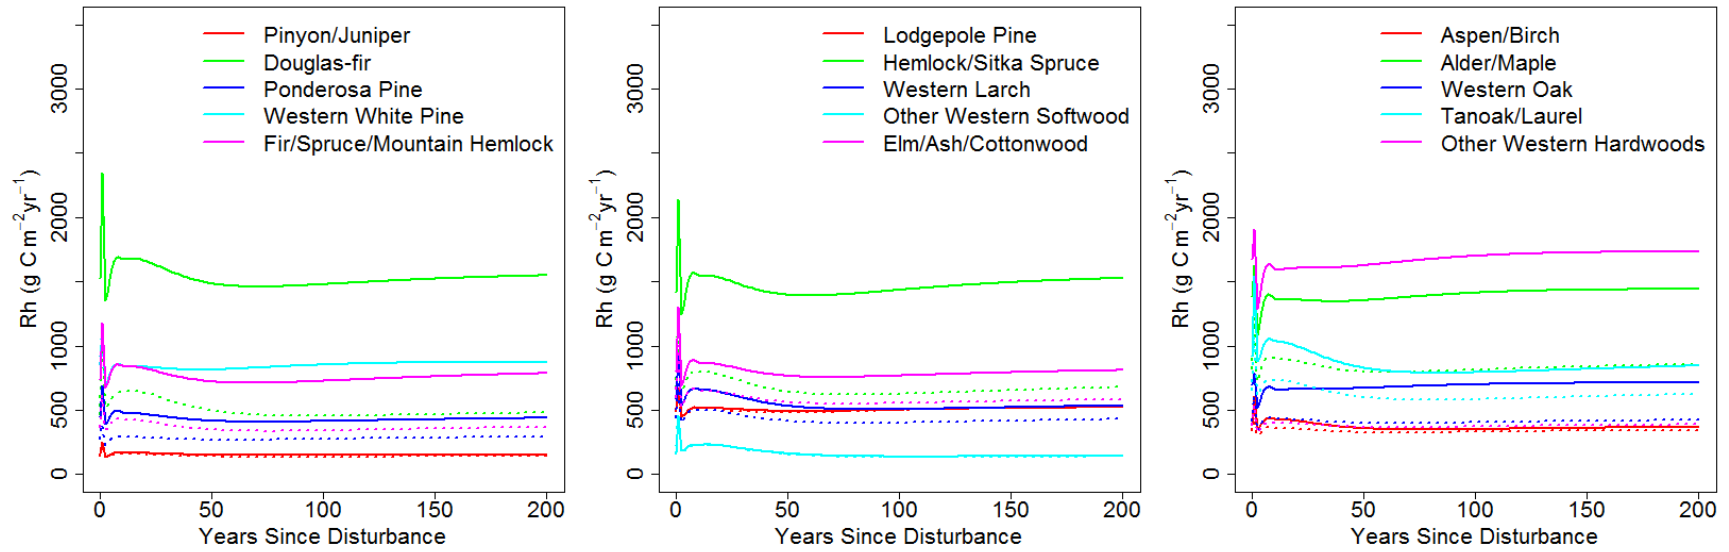

**Fig. S10** Post-fire characteristic trajectories of heterotrophic respiration ( $R_h$ ) for high severity fire in the PNW region. Solid lines are plotted for high site productivity, and dashed lines for low productivity.

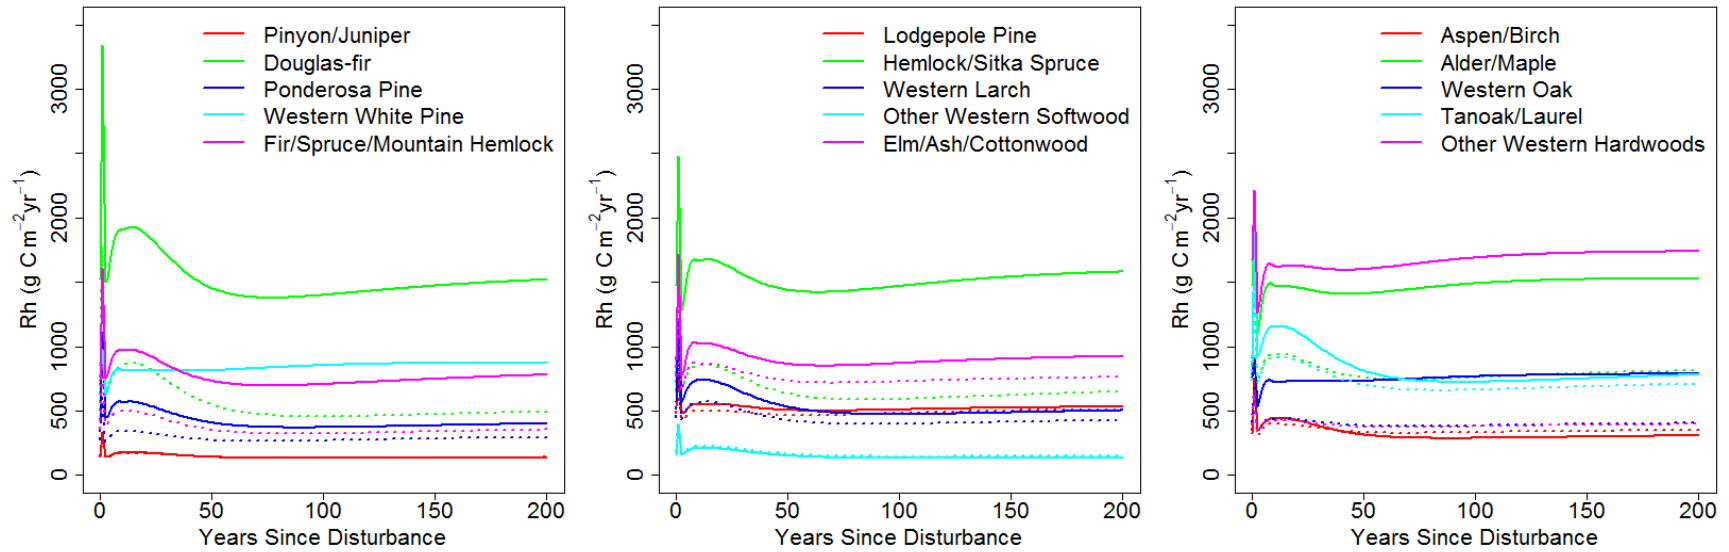

**Fig. S11** Characteristic heterotrophic respiration ( $R_h$ ) trajectories for low (left), medium (middle) and high (right) bark beetle severity level in the PNW region. Solid lines are plotted for high site productivity, and dashed lines for low productivity.

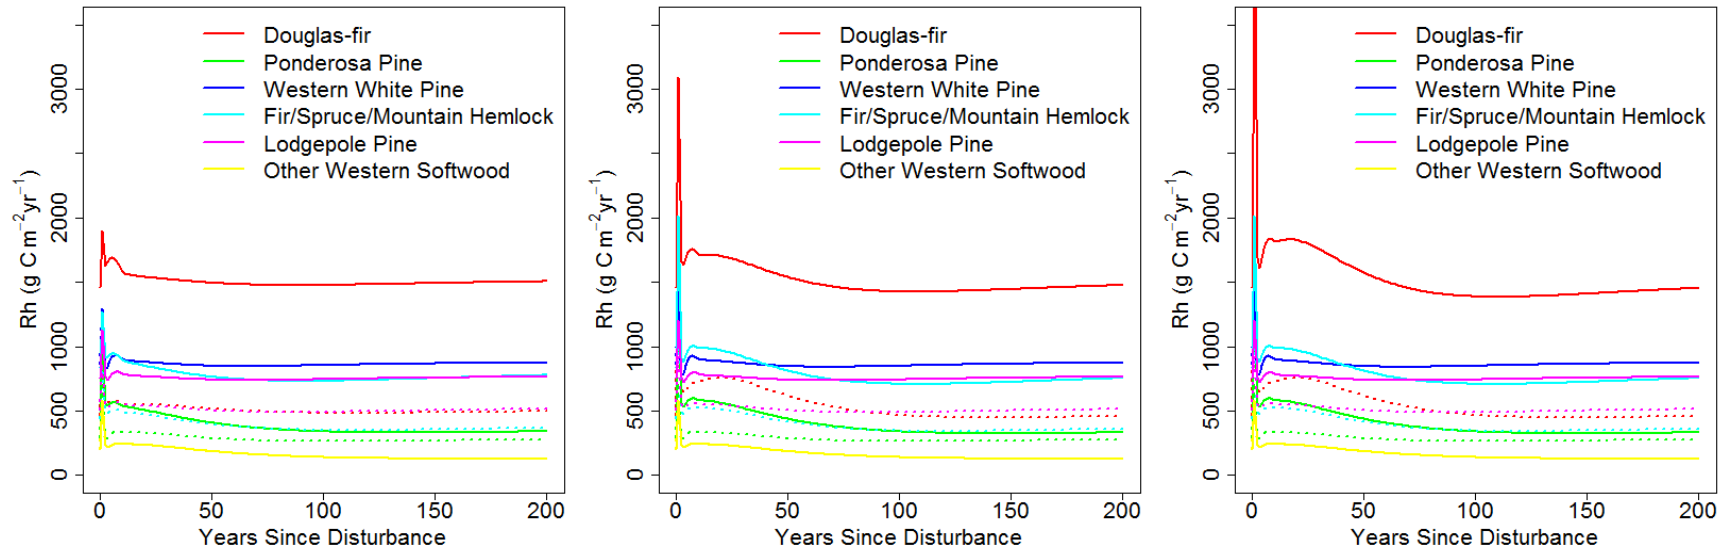

**Fig. S12** Characteristic trajectories of carbon stocks in soil organic carbon pool (all but the slow part) following a stand-replacing disturbance in the PNW region.

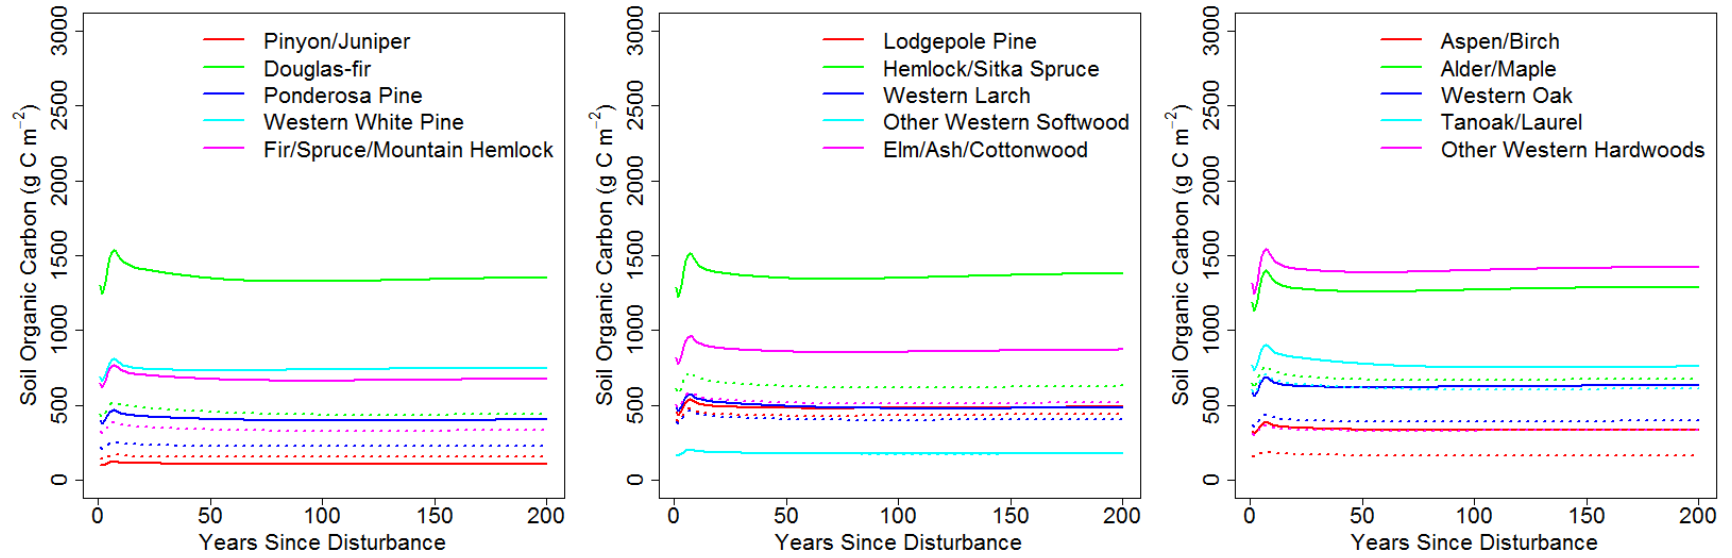

**Fig. S13** Characteristic trajectories of carbon stocks in litter pool following a stand-replacing disturbance in the PNW region.

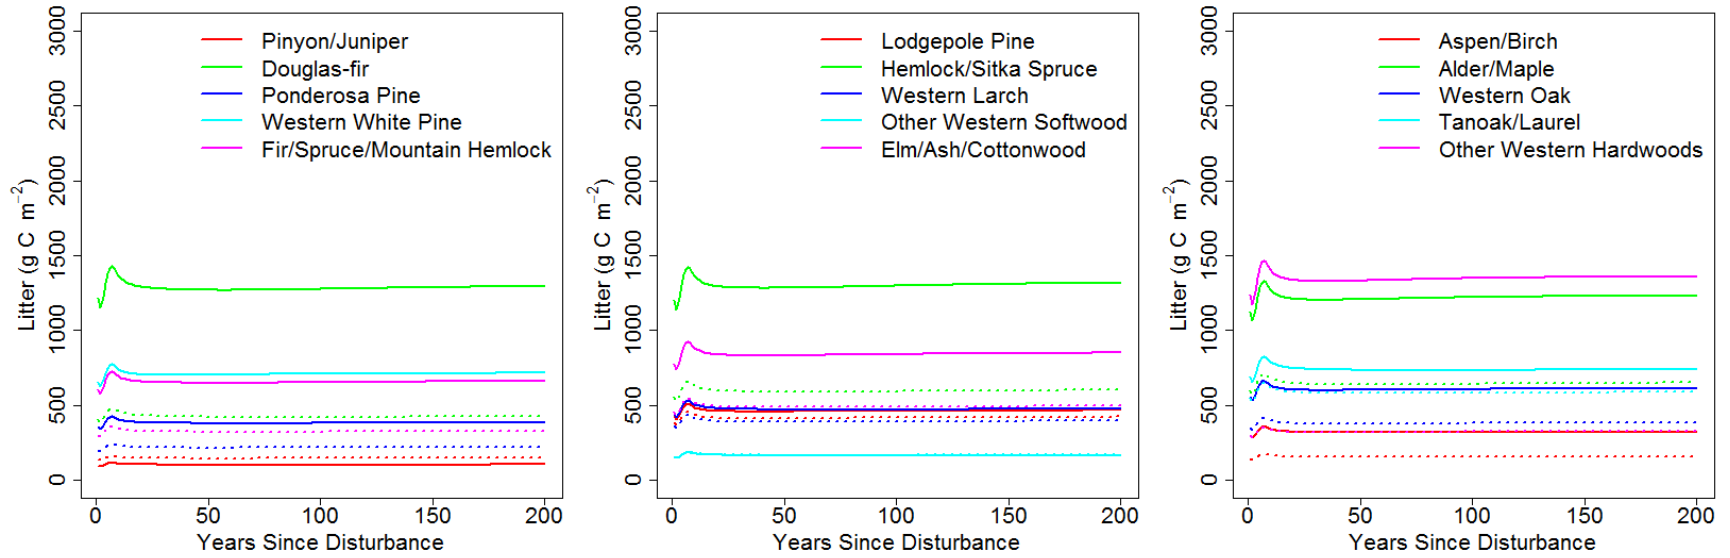



**Fig. S14** Characteristic trajectories of carbon stocks in slow turnover soil carbon pool following a stand-replacing disturbance in the PNW region.

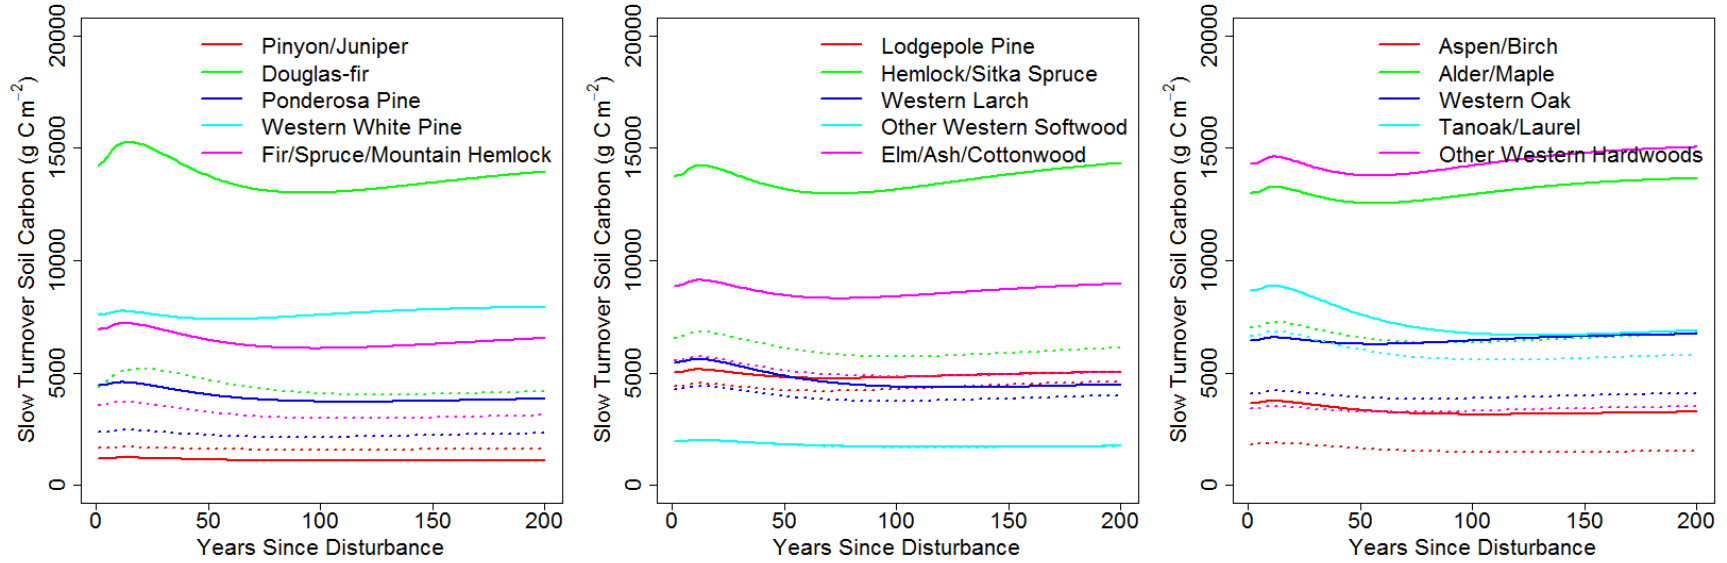

**Fig. S15** Characteristic trajectories of carbon stocks in aboveground coarse woody debris following a stand-replacing disturbance in the PNW region.

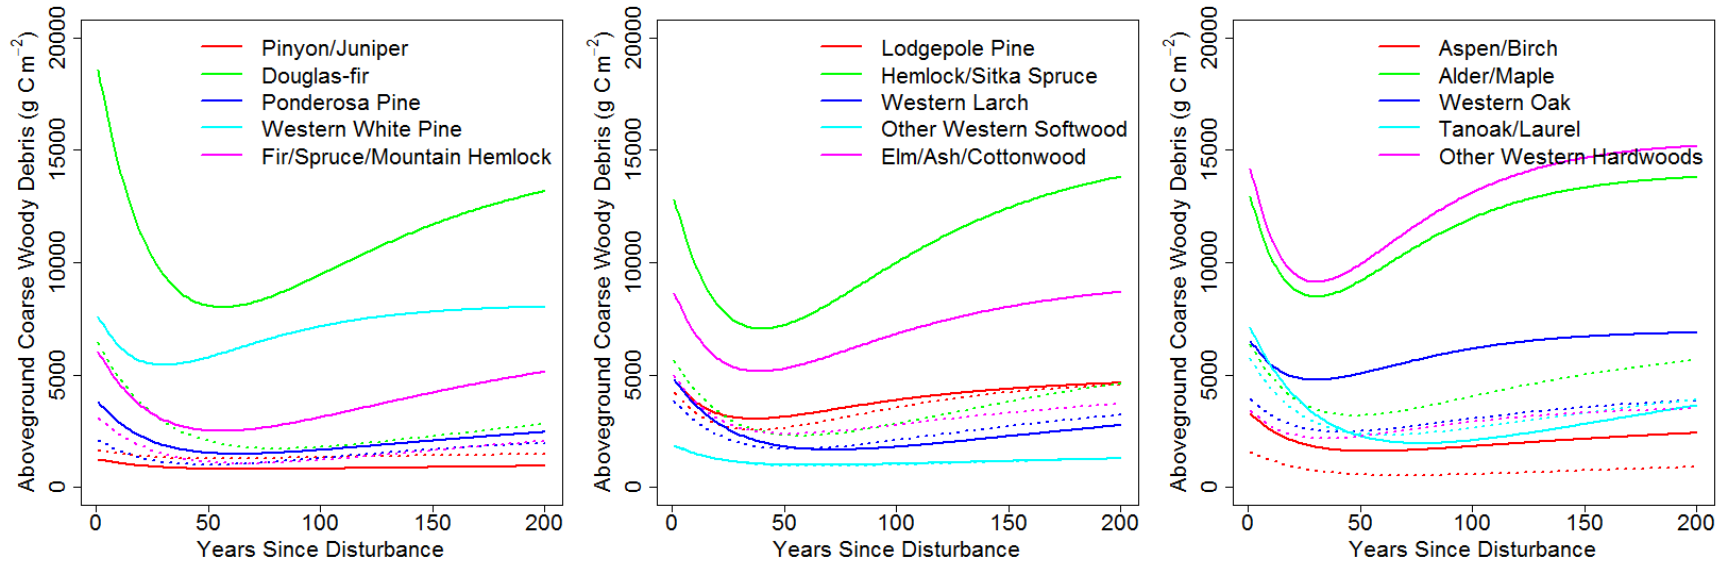

**Fig. S16** Characteristic trajectories of carbon stocks in belowground coarse woody debris following a stand-replacing disturbance in the PNW region.

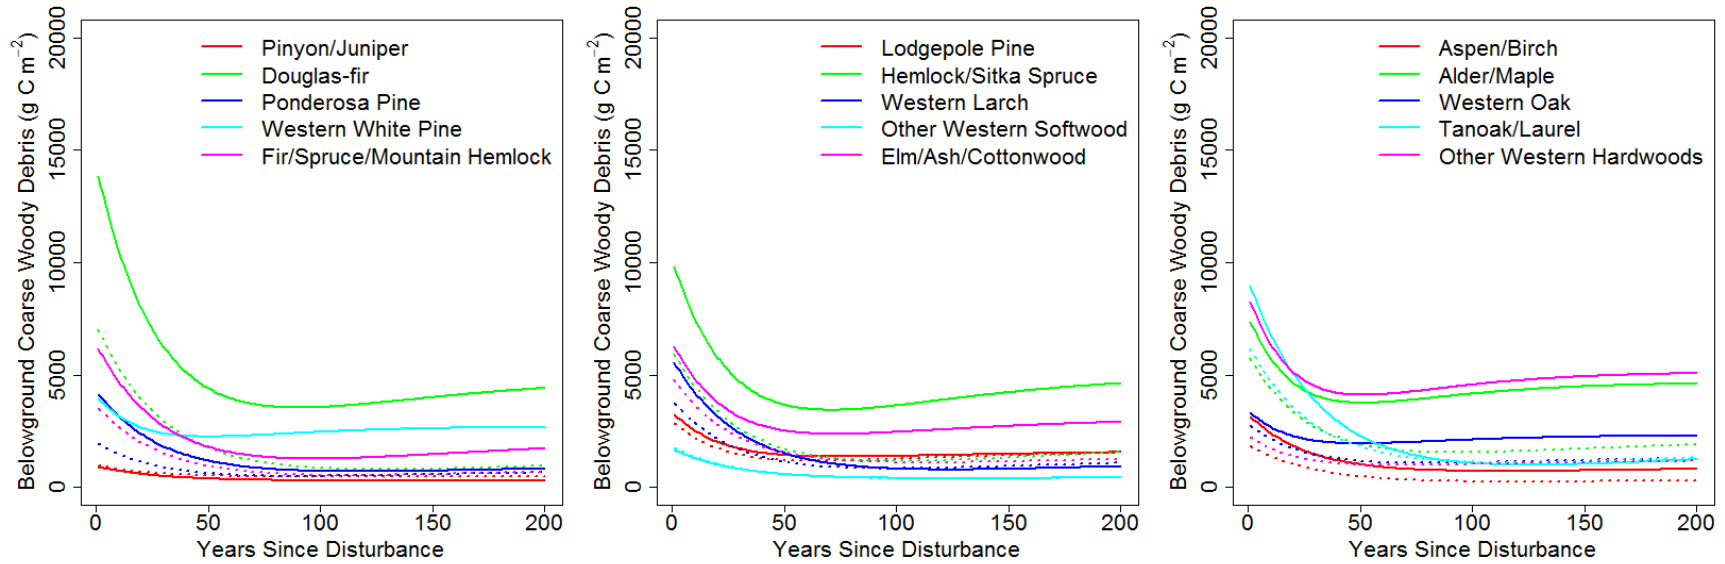

**Fig. S17** Characteristic trajectories of carbon stocks in total live woody biomass following a stand-replacing disturbance in the PNW region.

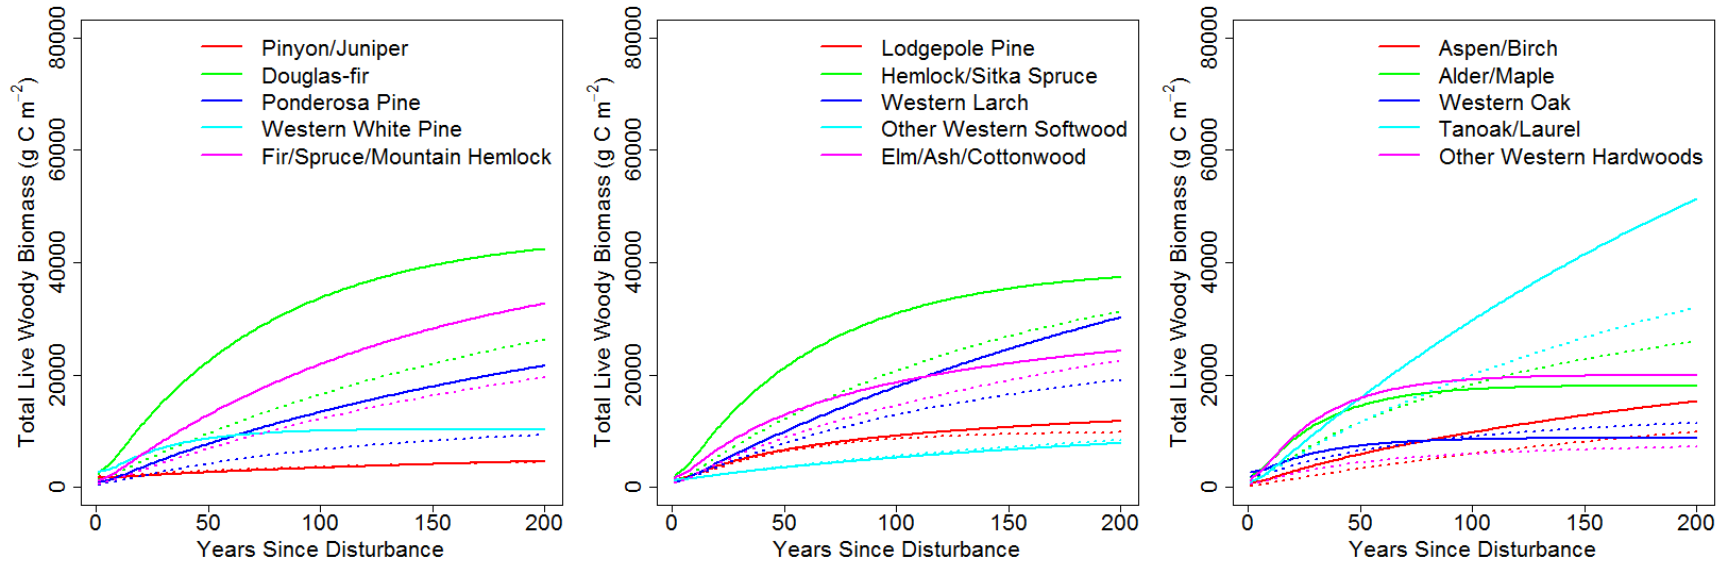

Supplement: Supplementary file 1 [file bg-13-6321-2016-supplement.pdf]
